# Supplementary material for: Effects of Resvega on Inflammasome Activation in Conjunction with Dysfunctional Intracellular Clearance in Retinal Pigment Epithelial (RPE) Cells
Source: PubMed Central journal article supplement (PMC7825790; doi:10.3390/antiox10010067), 2021-01-07
Supplement: antioxidants-10-00067-s001.pdf [file antioxidants-10-00067-s001.pdf]

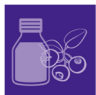

## Supplementary Figures

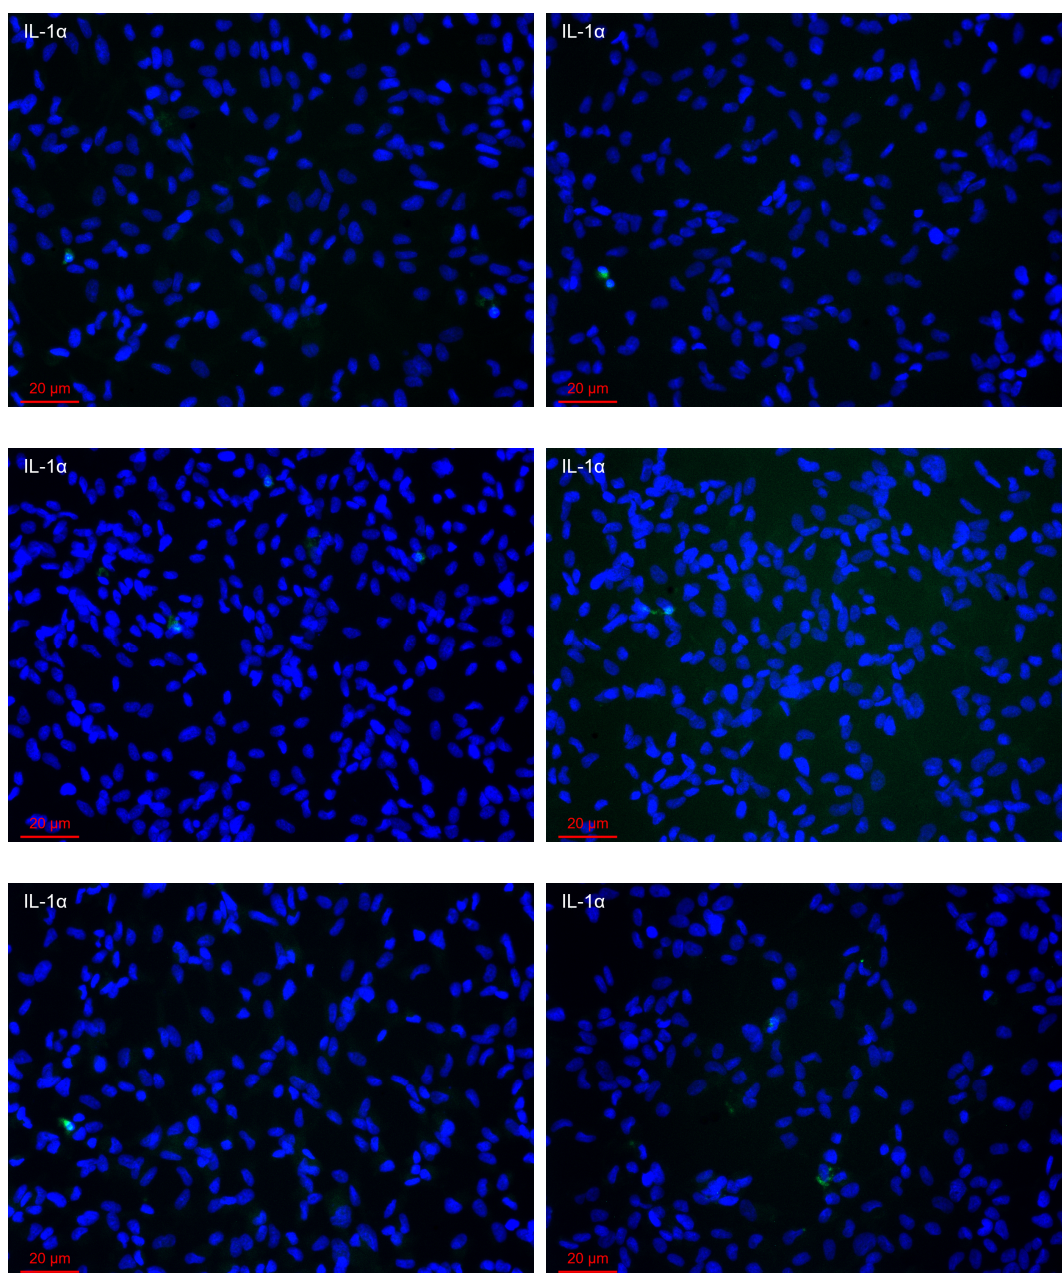

**Figure S1.** IL-1 $\alpha$ -priming did not increase caspase-1 activity in ARPE-19 cells. Caspase-1 activity was measured using a cell-permeable fluorochrome inhibitor of caspase-1 (FLICA, FAM-YVAD-FMK). A green fluorescent signal indicates active caspase-1 attached to the FAM-YVAD-FMK-probe. Nuclei were stained using the blue Hoechst 33342 dye. Pictures were detected using a fluorescent microscope (Zeiss ApoTome.2 Imager M2 microscope).

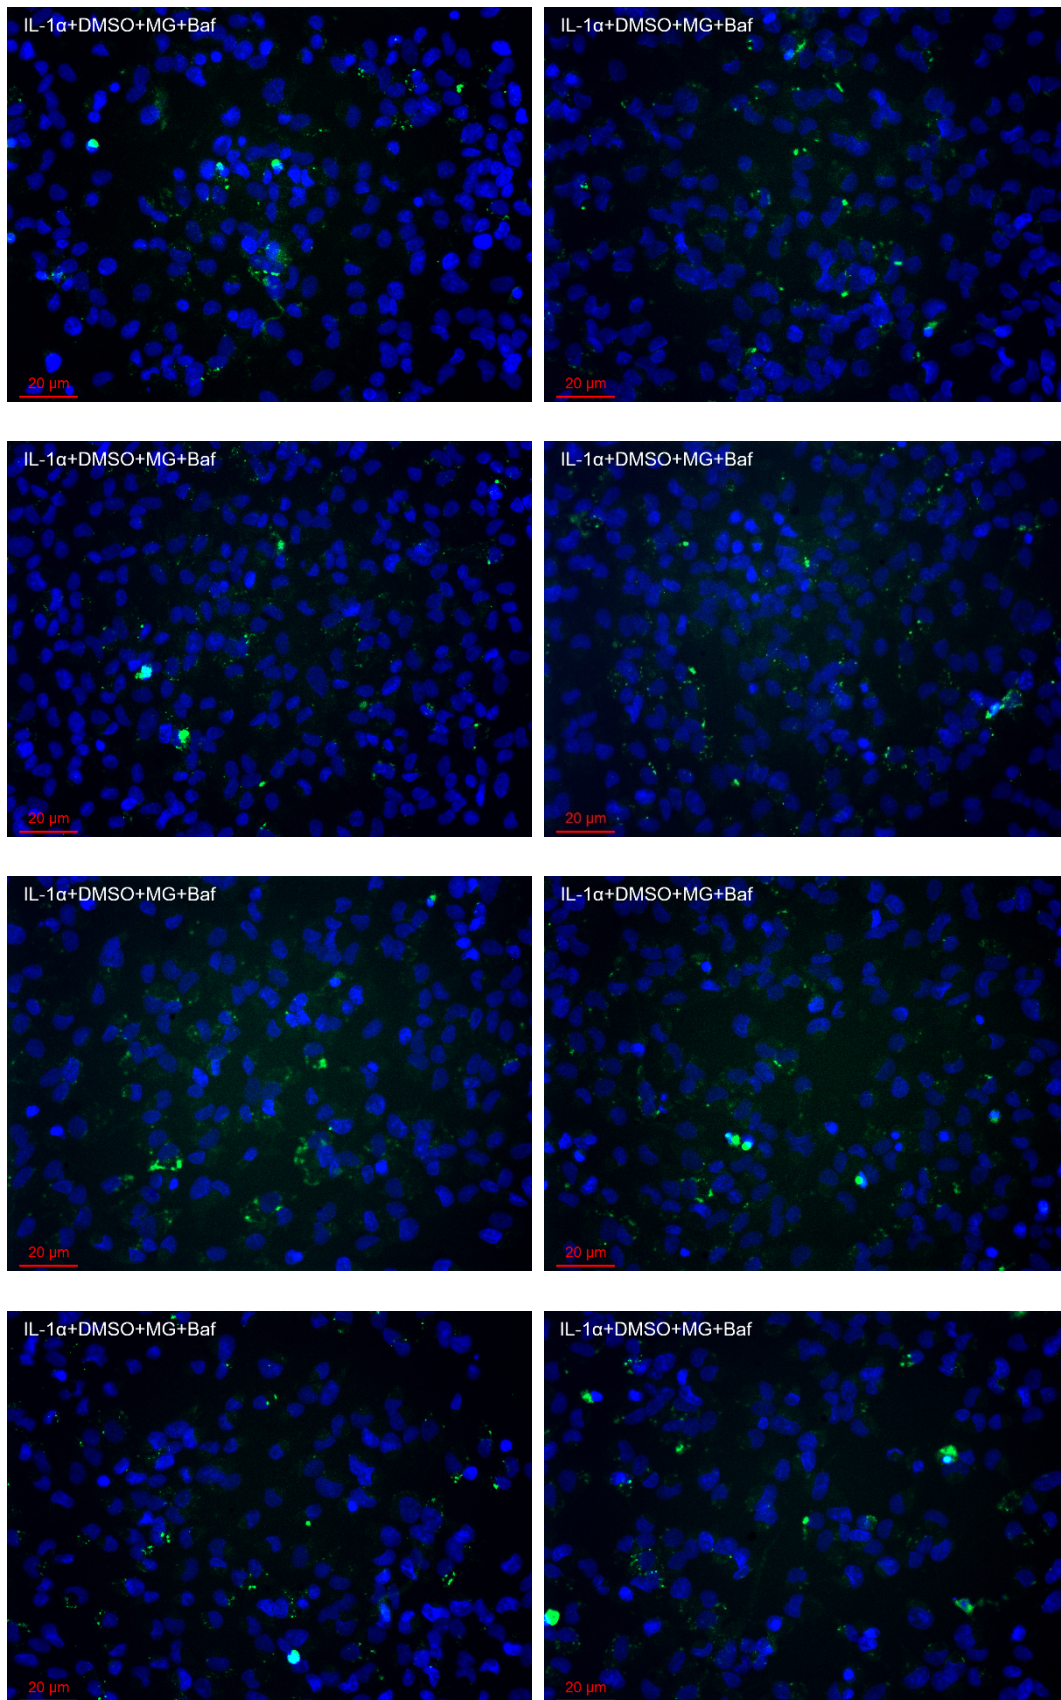

**Figure S2.** MG-132 (MG; 5  $\mu$ M) and bafilomycin A1 (BafA; 50 nM) exposure with DMSO control induced caspase-1 activity in IL-1 $\alpha$ -primed ARPE-19 cells. Caspase-1 activity was measured using the fluorochrome inhibitor of caspase-1 (FLICA, FAM-YVAD-FMK). A green fluorescent signal indicates active caspase-1 attached to the FAM-YVAD-FMK-probe. Nuclei were stained using the

---

blue Hoechst 33342 dye. Pictures were captured by a fluorescent microscope (Zeiss ApoTome.2 Imager M2 microscope).

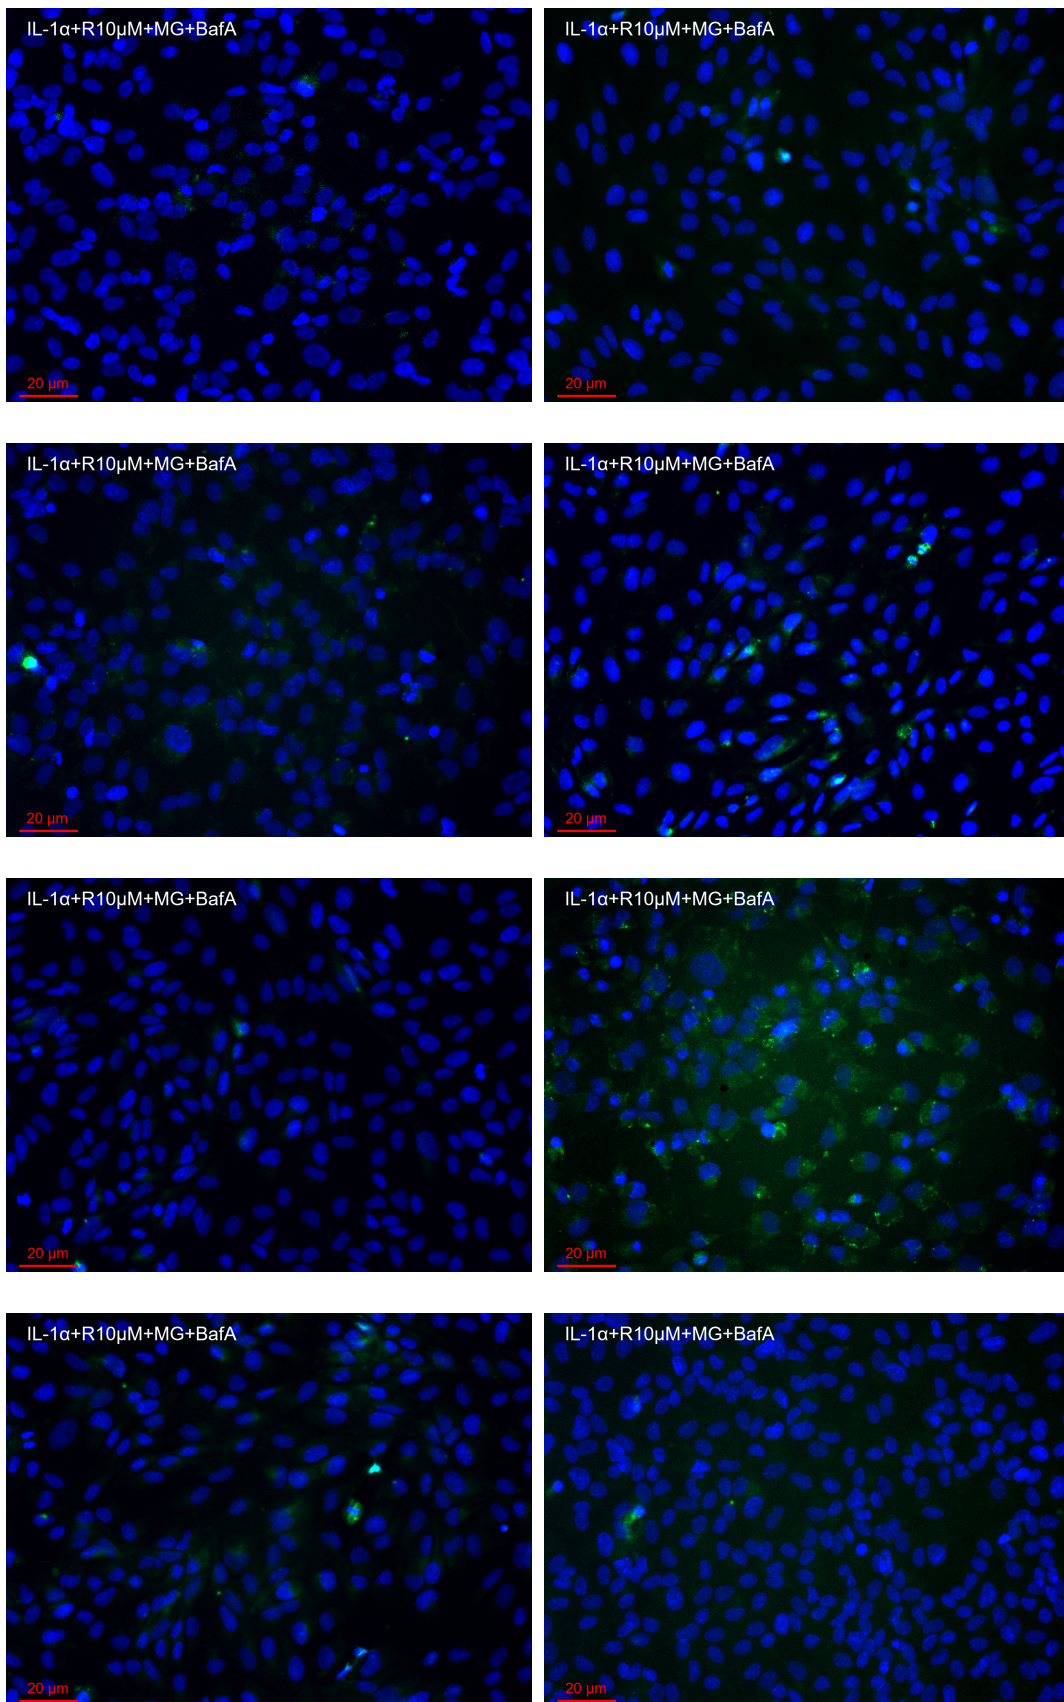

**Figure S3.** Resvega (R10 $\mu$ M) decreased MG-132 (MG; 5  $\mu$ M) and bafilomycin A1 (BafA; 50 nM) induced caspase-1 activity in IL-1 $\alpha$ -primed ARPE-19 cells. Caspase-1 activity was measured using the fluorochrome inhibitor of caspase-1 (FLICA, FAM-YVAD-FMK). A green fluorescent signal indicates active caspase-1 attached to the FAM-YVAD-FMK-probe. Nuclei were stained using the

---

blue Hoechst 33342 dye. Pictures were captured by a fluorescent microscope (Zeiss ApoTome.2 Imager M2 microscope).
